# Supplementary material for: Improved performance and stability of field-effect transistors with polymeric residue-free graphene channel transferred by gold layer
Source: Royal Society of Chemistry journal article supplement (doi:10.1039/c3cp53900h), 2013-11-26
Supplement: c3cp53900h.pdf [file c3cp53900h.pdf]

# Improved Performance and Stability of Field-Effect Transistors with Polymeric Residue-free Graphene Channel Transferred by Gold Layer

Mi Jang, Jin-Heak Jung, Tran Quang Trung, Bo-Yeong Kim, Nae-Eung Lee\*

## Supporting Information

### Supporting Figure S1

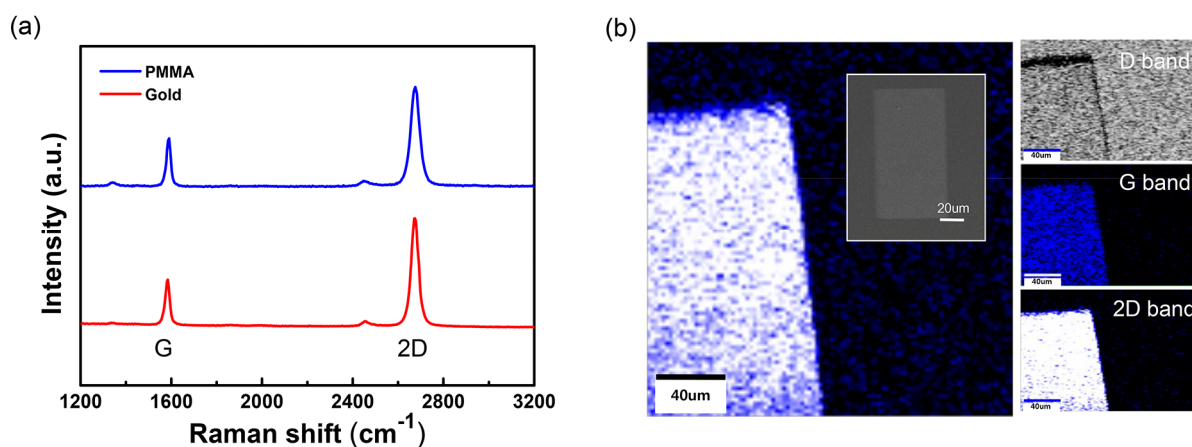

**Figure S1. Raman spectra and mapping of Gr layers transferred by the two transfer methods. (a)** Raman spectra of CVD-grown Gr transferred by gold and PMMA. **(b)** Confocal Raman spectroscopy on gold-transferred Gr patterned by  $\text{O}_2$  RIE, with the inset showing an FE-SEM image for patterned domain size of the active channel layer.

### Supporting Figure S2

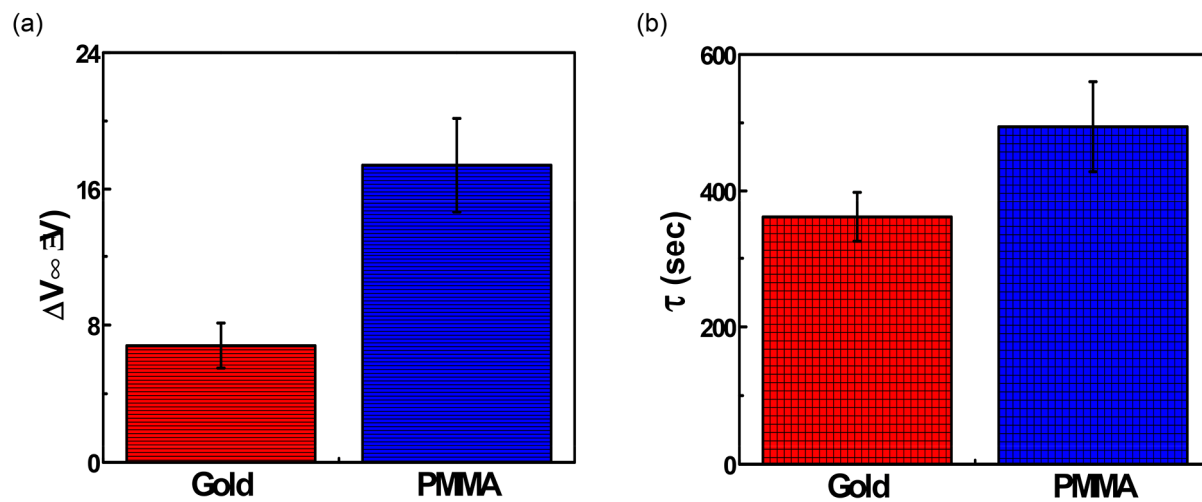

**Figure S2. Statistical data of gate bias stress effects in GFET array.** The average values with standard deviation of **(a)** the equilibrium shift of the Dirac point at  $t = +\infty$  ( $\Delta V_{\infty}$ ) and **(b)** the characteristic equilibrium time constant ( $\tau$ ).

**Supporting Table S1. Comparison of the C 1s peak of Gr by the two transfer methods from XPS spectra.**

|                       | Gold               |          |           | PMMA               |          |           |
|-----------------------|--------------------|----------|-----------|--------------------|----------|-----------|
|                       | Peak position (eV) | Area (%) | FWHM (eV) | Peak position (eV) | Area (%) | FWHM (eV) |
| <b>sp<sup>2</sup></b> | 284.6              | 67       | 1.49      | 284.5              | 54.9     | 1.53      |
| <b>sp<sup>3</sup></b> | 285.4              | 6.4      | 1.21      | 285.4              | 9.6      | 1.55      |
| <b>C-O</b>            | 286.1              | 13.3     | 1.55      | 286.2              | 16.3     | 1.93      |
| <b>C=O</b>            | 287.3              | 7.7      | 2.09      | 287.6              | 10.7     | 3.27      |
| <b>O-C=O</b>          | 289.1              | 5.6      | 3.18      | 290.1              | 8.5      | 4.98      |
